# Supplementary material for: Angiotensin II-Induced Cardiac Effects Are Modulated by Endocannabinoid-Mediated CB1 Receptor Activation
Source: PubMed Central journal article supplement (PMC8064086; doi:10.3390/cells10040724), 2021-03-24
Supplement: cells-10-00724-s001.pdf [file cells-10-00724-s001.pdf]

## Supplementary

### 1. *CB<sub>1</sub> receptor expression in mouse cardiac tissue*

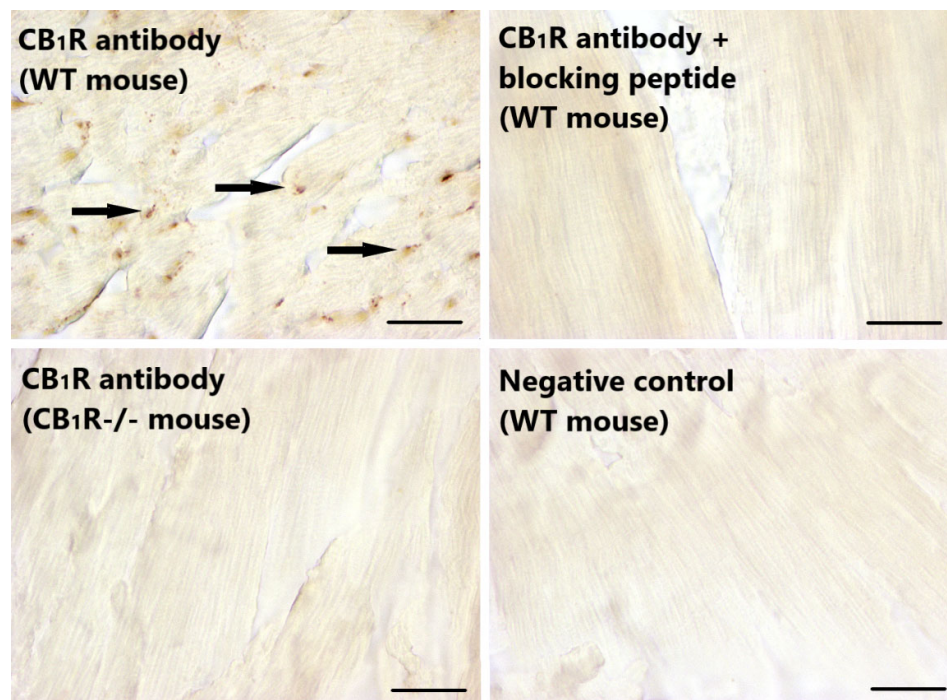

**Suppl. Figure S1.** CB<sub>1</sub> receptor (CB<sub>1</sub>R) immunostaining in wild type and CB<sub>1</sub>R knockout murine cardiac tissue. In wild type (WT) hearts CB<sub>1</sub>R immunostaining confirmed CB<sub>1</sub>R expression in mouse cardiac tissue (black arrows). No staining was detected in the absence of the primary antibody (negative control) and a robust decrease in immunostaining was observed when the CB<sub>1</sub> primary antibody was applied together with blocking peptide. CB<sub>1</sub>R staining was undetectable in hearts of CB<sub>1</sub>R knockout (CB<sub>1</sub>R<sup>-/-</sup>) mice, suggesting high specificity of the applied CB<sub>1</sub>R antibody (CB<sub>1</sub> Receptor Polyclonal Antibody (rabbit), Cayman Chemicals, Ann Arbor, USA) Scale bar: 100  $\mu$ m.

### 2. *Effects of CB agonist 2-AG*

To assess the effects of CB agonist 2-AG on cardiac function, it was infused to the perfusate of isolated hearts in increasing concentrations ( $10^{-7}$ ,  $3 \times 10^{-7}$ ,  $10^{-6}$  M), each concentration was administered for 3 min. A moderate rise in coronary flow and a slight decrease in contractile function (developed pressure, LVDevP) could be observed at the highest concentration applied. However, these changes did not reach the level of significance (Suppl. Figure 2).

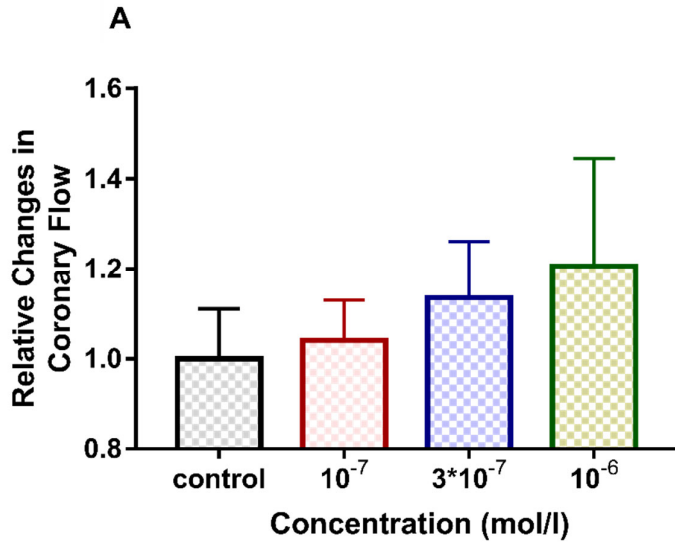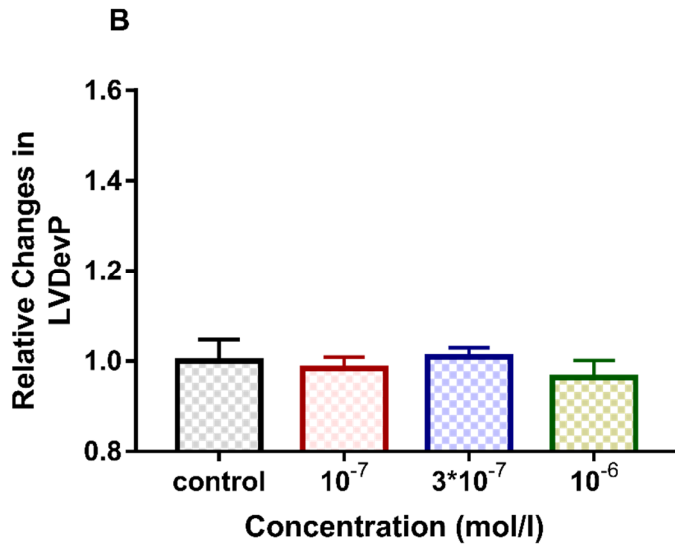

**Suppl. Figure S2.** Concentration-dependent effects of 2-arachidonoylglycerol (2-AG) on coronary flow (**A**) and left ventricular developed pressure (LVDevP) (**B**) of isolated rat hearts. In these experiments 2-AG was applied in a range of  $10^{-7}$  to  $10^{-6}$  M. The increasing concentrations of 2-AG were infused into the perfusion line consecutively, each for 3 min. Maximal effects during the 3-min infusions are presented. Mean  $\pm$  SEM;  $n=4$ ;  $p$  values are greater than 0.05 vs. control (pre-infusion value); one-way repeated measurement ANOVA
